# Supplementary material
Source: publisher figshare collection journal article supplement (https://acs.figshare.com/ndownloader/files/4123837)
Supplement: Supplementary file 1 [file 4123837]

## SUPPORTING MATERIAL

### **Molecular dynamics simulation of Autotaxin: Roles of the nuclease-like domain and the glycan modification**

Michio Koyama<sup>†</sup>, Hiroshi Nishimasu<sup>†</sup>, Ryuichiro Ishitani<sup>†‡\*</sup>, and Osamu Nureki<sup>†\*</sup>

<sup>†</sup>*Department of Biophysics and Biochemistry, Graduate School of Science, The University of Tokyo, 2-11-16 Yayoi, Bunkyo-ku, Tokyo 113-0032, Japan;*

<sup>‡</sup>*RIKEN Advanced Science Institute, 2-1 Hirosawa, Wako-shi, Saitama 351-0198, Japan*

\*To whom reprint requests should be addressed. Phone: +81-3-5841-4392; Facsimile:

+81-3-5841-8057; E-mail: [nureki@biochem.s.u-tokyo.ac.jp](mailto:nureki@biochem.s.u-tokyo.ac.jp) or

[ishitani@biochem.s.u-tokyo.ac.jp](mailto:ishitani@biochem.s.u-tokyo.ac.jp)

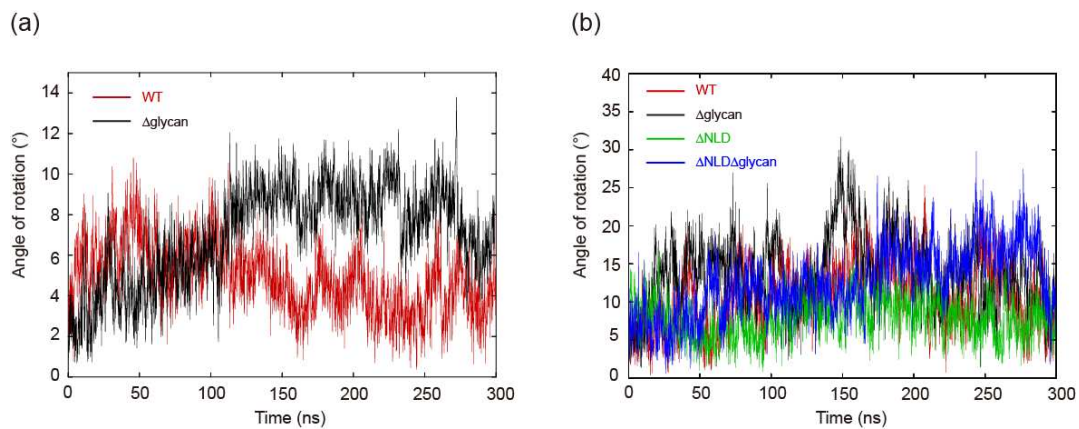

Figure S1

Domain rotation between (a) the CAT and NLD domains and (b) SMB-like domain 1 and the CAT domain in each simulation.

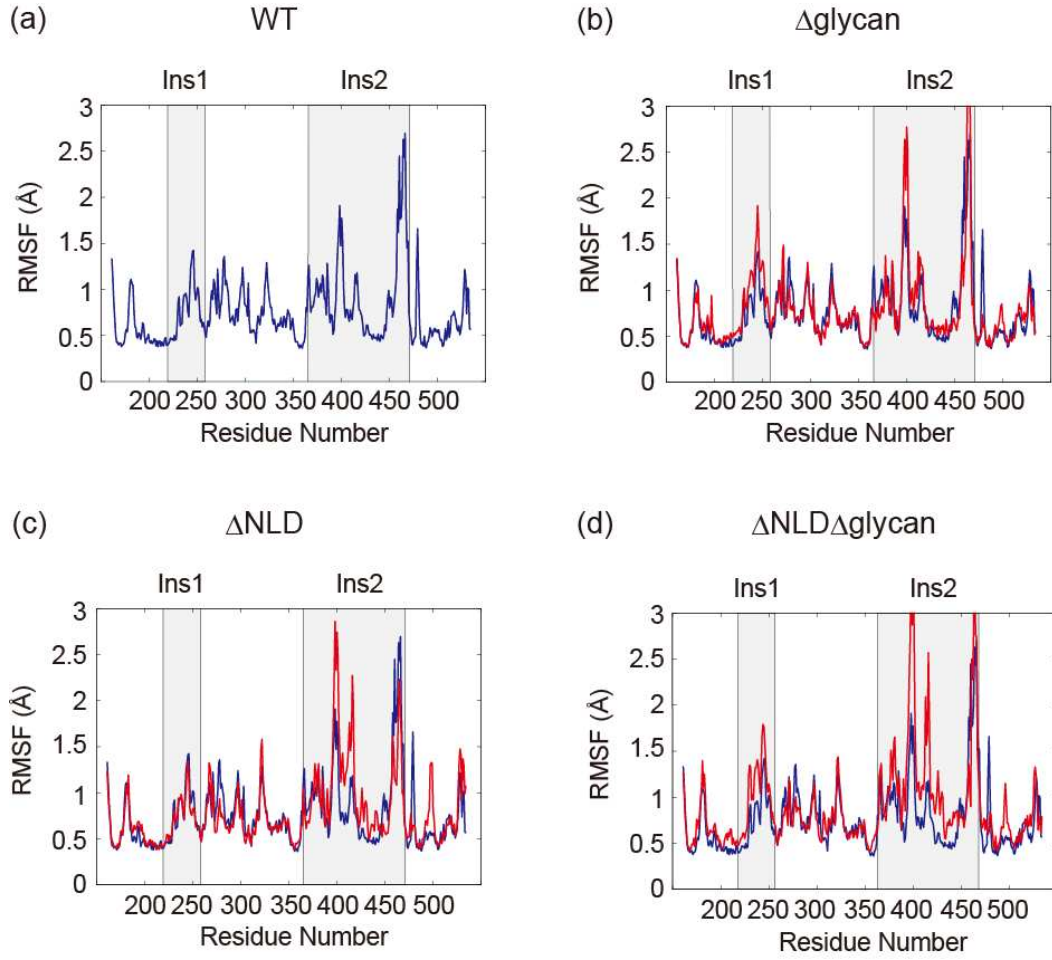

**Figure S2**

RMSF values for each simulation. The blue lines show the RMSF values of the WT simulation (a-d), and the red lines show the RMSF values of the (b)  $\Delta$ glycan, (c)  $\Delta$ NLD, and (d)  $\Delta$ NLD $\Delta$ glycan simulations.

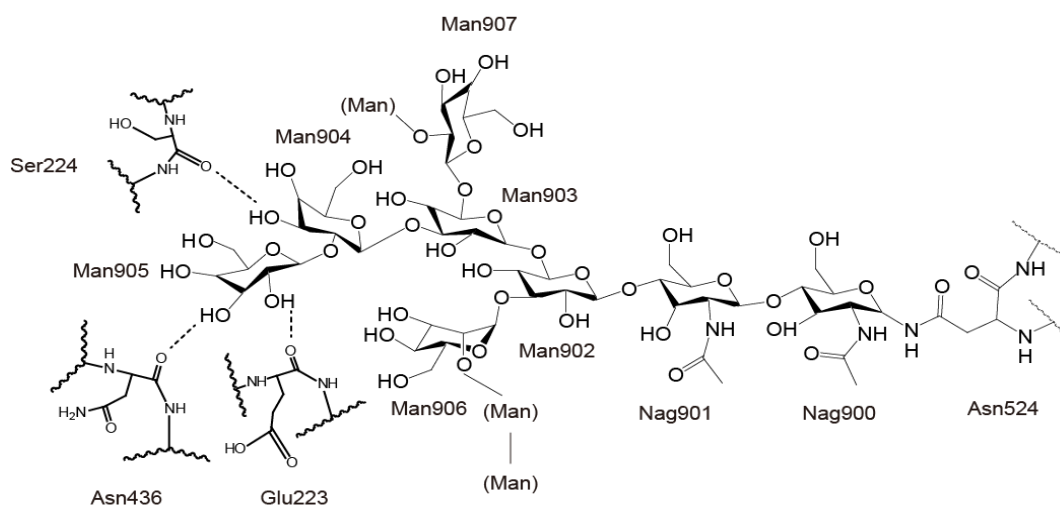

Figure S3

The structure of the glycan on Asn-524. Mannoses with undefined electron densities in the crystal structure are shown in parentheses. Hydrogen bonds between the glycan on Asn-524 and ATX are shown as dashed lines.

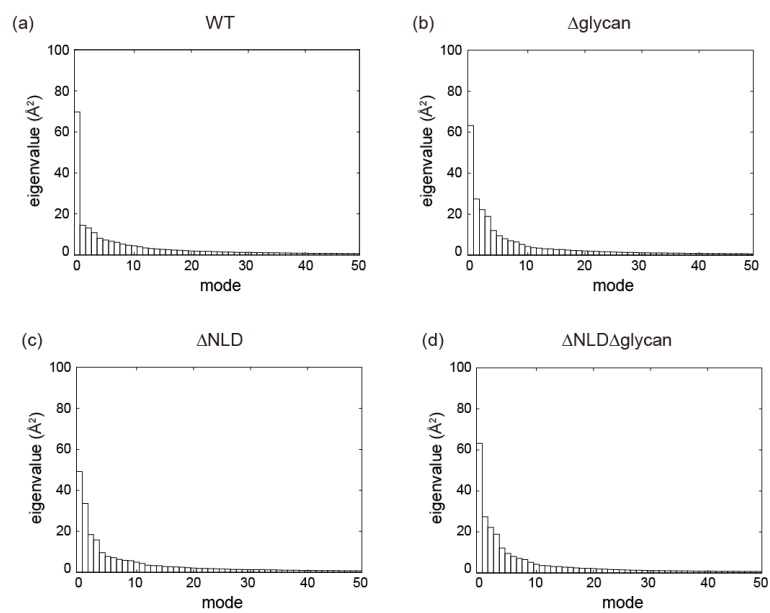

**Figure S4**

The eigenvalues of PCA for each simulation.
